# Supplementary material for: 3D QSAR Pharmacophore Based Virtual Screening, ADME Analysis and Estimation of MM/GBSA binding Free Energies of Azoles as a Potential Inhibitor of DprE1 for Mycobacterium Tuberculosis
Source: Research Square preprint supplement (doi:10.21203/rs.3.rs-571591/v1), 2021-06-02
Supplement: Supplementary file 1 [file 666d2a6b1f57725469ca7f64.docx]

| **Table 4**. Quick Prop Results of top fifteen molecules. | |
| --- | --- |
| **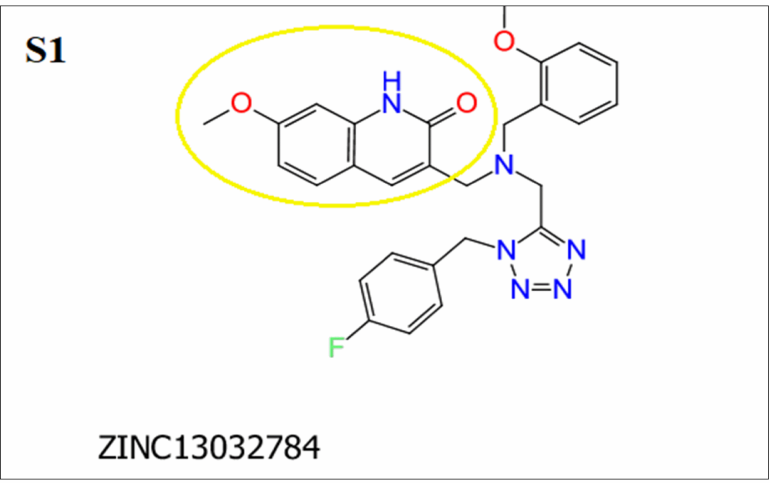** | M.Wta: 514.5  DHB: 1  AHB : 9  QPlogPoct: 24.9  QPlogPO/w :4.48  QPlog S : -4.97  QPlogBB : -0.69 |
| **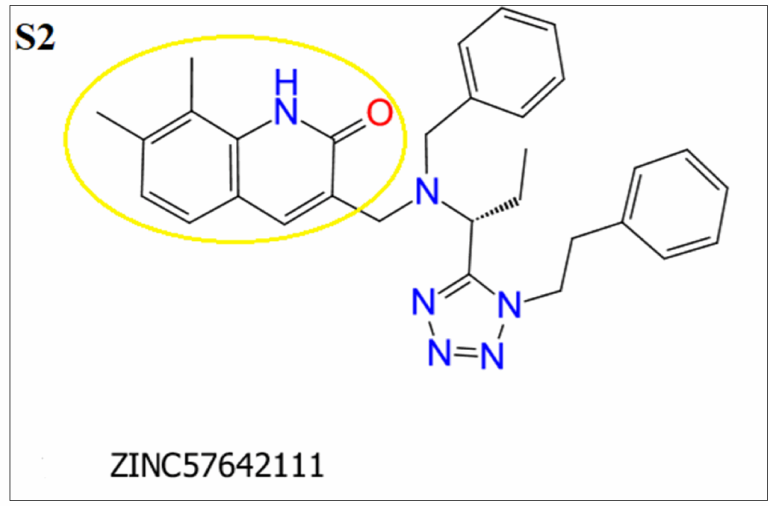** | M.Wta: 506.0  DHB: 1  AHB : 7.5  QPlogPoct: 24.91  QPlogPO/w :5.12  QPlog S : -5.46  QPlogBB : -1.08 |
| **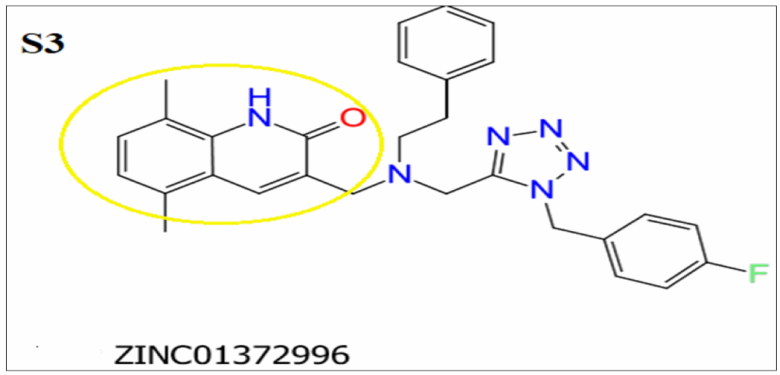** | M.Wta: 495.5  DHB: 1  AHB : 7.5  QPlogPoct: 24.56  QPlogPO/w :4.97  QPlog S : -5.90  QPlogBB: -0.99 |
| **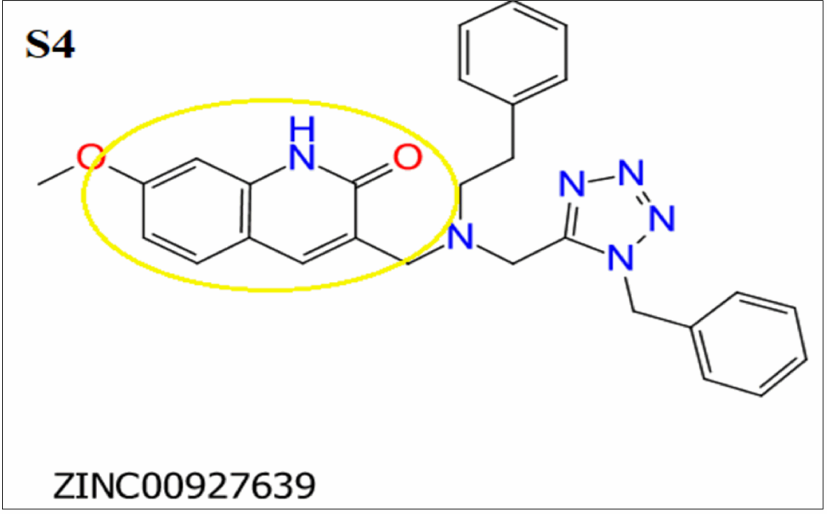** | M.Wta: 480.5  DHBb: 1  AHBc : 8.2  QPlogPoctd: 23.8  QPlogPO/we : 4.41:  QPlog S : 5.35  QPlogBB: -1.15 |
| **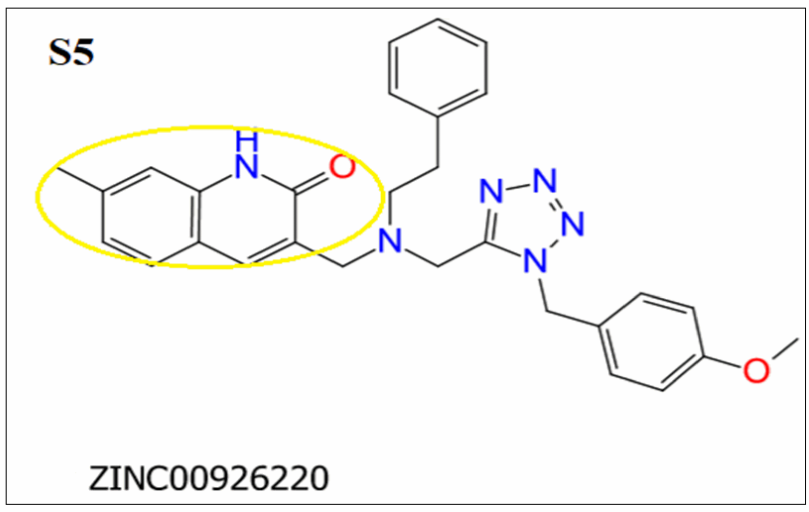** | M.Wta: 480.5  DHBb: 1  AHBc : 8.2  QPlogPoctd: 23.8  QPlogPO/we : 4.41:  QPlog S : 5.35  QPlogBB: -1.15 |
| **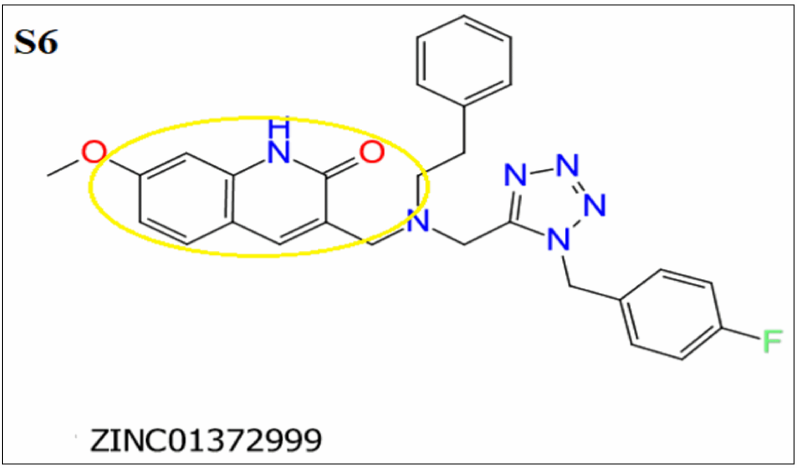** | M.Wta: 498.5  DHBb: 1  AHBc : 8.2  QPlogPoctd: 25.43  QPlogPO/we :4.92  QPlog S : -6.35  QPlogBB:-1.1 |
| **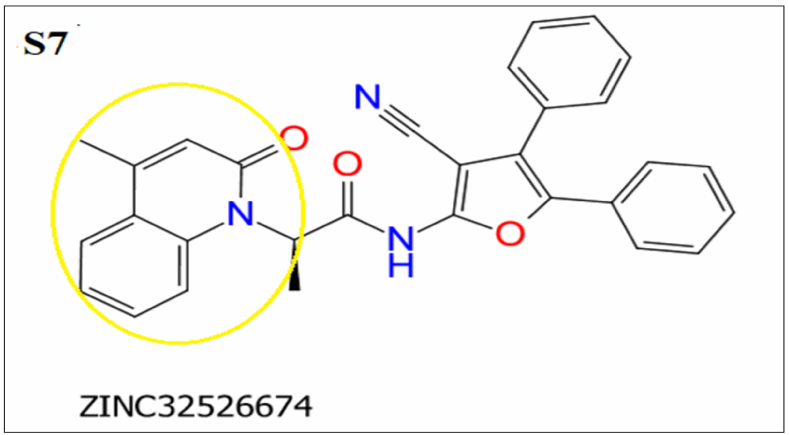** | M.Wta: 473.0  DHBb: 1  AHBc : 7.5  QPlogPoctd: 24.33  QPlogPO/we :5.10  QPlog S : -8.15  QPlogBB:-1.0 |
| **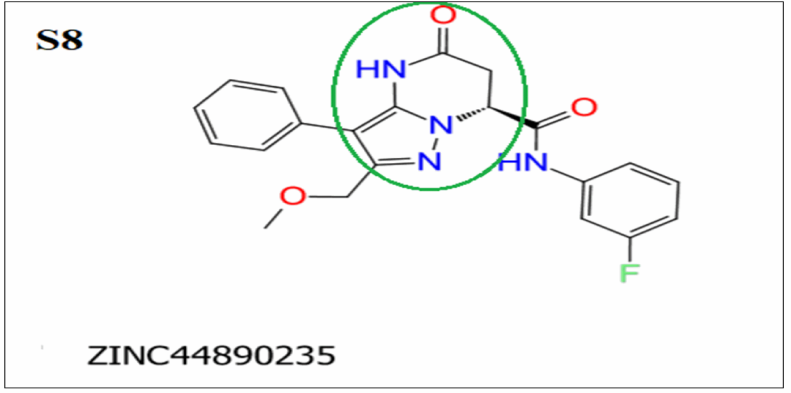** | M.Wta:394  DHBb: 2  AHBc : 7.7  QPlogPoctd: 22.49  QPlogPO/we :3.78  QPlog S : -6.35  QPlogBB:-0.59 |
| **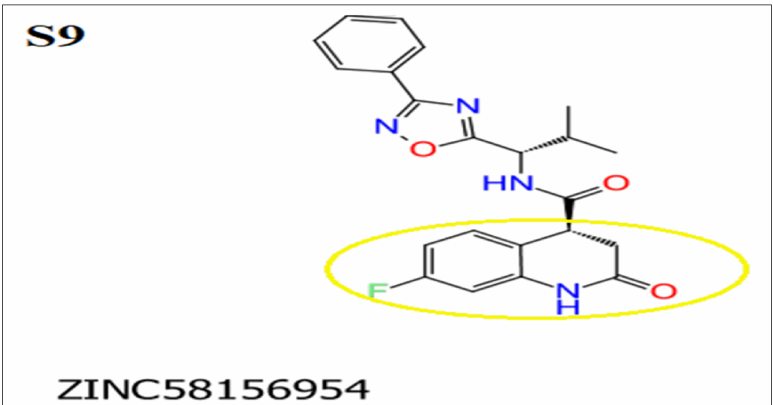** | M.Wta: 408.4  DHBb: 2  AHBc : 8  QPlogPoctd: 22.79  QPlogPO/we :2.72  QPlog S : -5.09  QPlogBB:-1.02 |
| **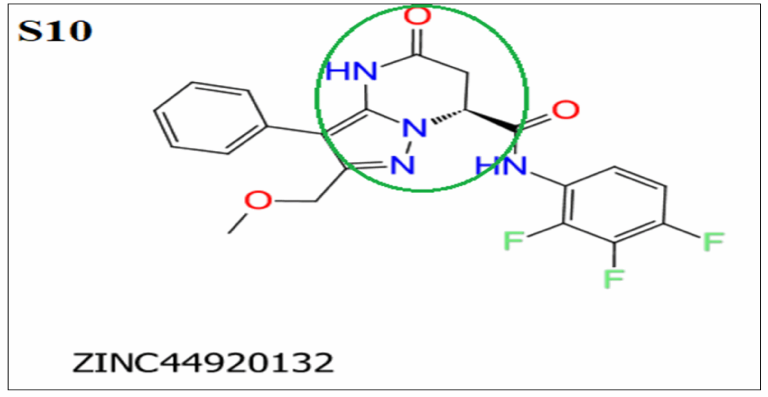** | M.Wta: 430.3  DHBb: 2  AHBc : 7.7  QPlogPoctd: 22.49  QPlogPO/we :3.78  QPlog S : -6.3  QPlogBB:-0.59 |
| **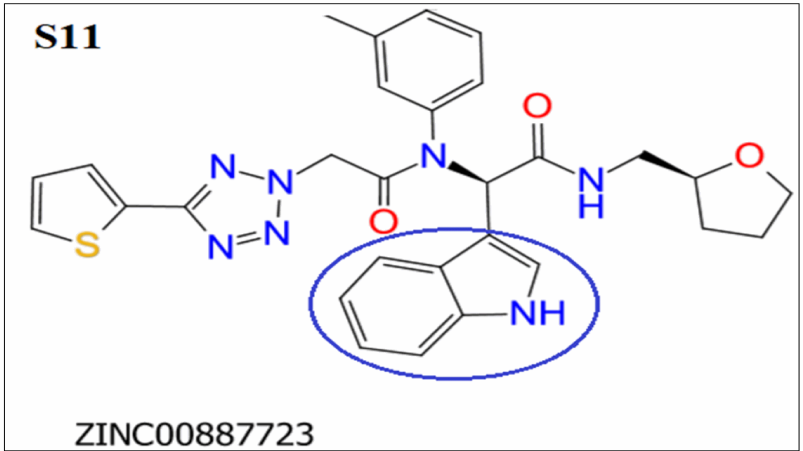** | M.Wta: 555.6  DHBb: 2  AHBc : 10.7  QPlogPoctd: 28.5  QPlogPO/we :3.9  QPlog S : -7.06  QPlogBB:-1.03 |
| **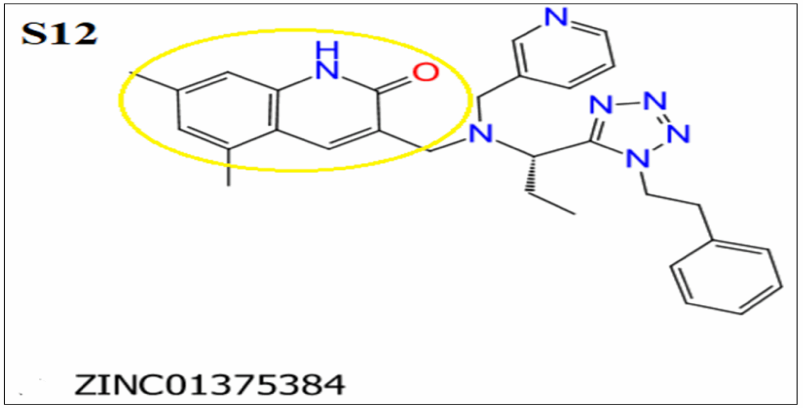** | M.Wta: 507.6  DHBb: 1  AHBc : 9  QPlogPoctd: 24.53  QPlogPO/we :4.26  QPlog S : -4.66  QPlogBB:-0.97 |
| **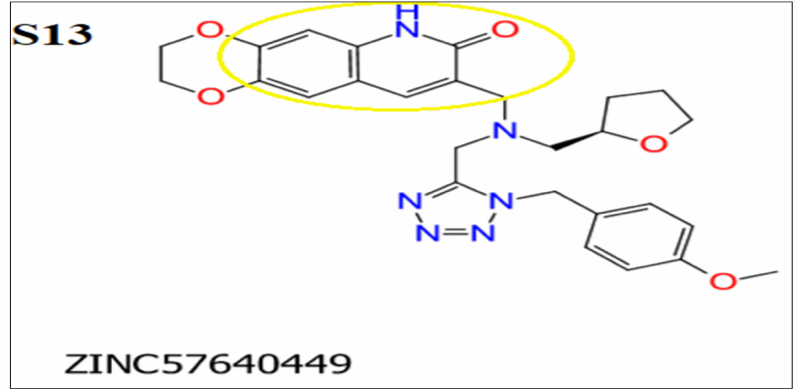** | M.Wta: 518.5  DHBb: 1  AHBc : 11.4  QPlogPoctd: 22.56  QPlogPO/we :2.8  QPlog S : -4.19  QPlogBB:-1.19 |
| **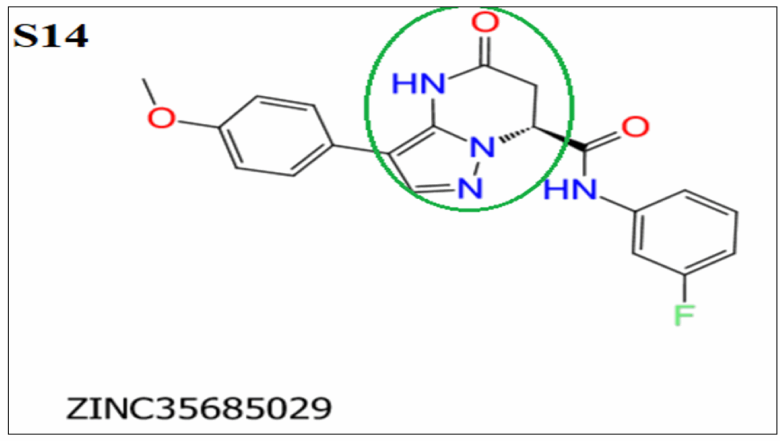** | M.Wta: 380.3  DHBb: 2  AHBc : 6.7  QPlogPoctd: 20.7  QPlogPO/we :3.34  QPlog S : -5.52  QPlogBB:-0.67 |
| **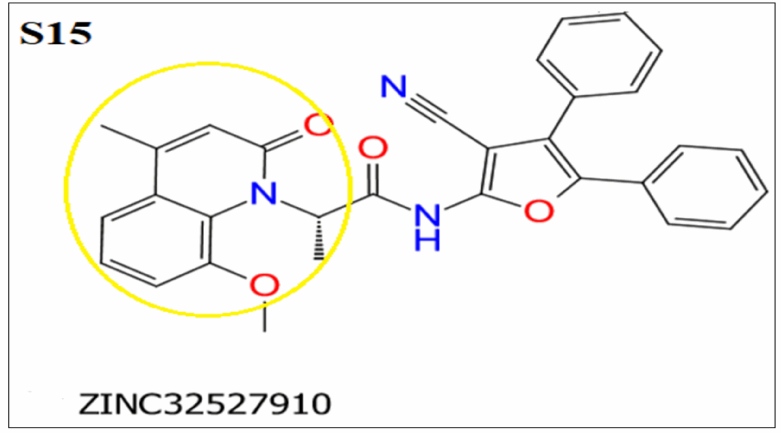** | M.Wta: 503.5  DHBb: 1  AHBc : 8.2  QPlogPoctd: 25.92  QPlogPO/we :5.20  QPlog S : -8.75  QPlogBB:-0.94 |
| Notes:a-molecular weight; b-hydrogen bond donor; c-hydrogen bond acceptor; e-partition coefficient  4H, 5H, 6H, 7H-Pyrazolo [1,5] pyramidin 5-one  1, 2 dihydroquinolin-2-one | |
