# Supplementary material for: 3D QSAR Pharmacophore Based Virtual Screening, ADME Analysis and Estimation of MM/GBSA binding Free Energies of Azoles as a Potential Inhibitor of DprE1 for Mycobacterium Tuberculosis
Source: Research Square preprint supplement (doi:10.21203/rs.3.rs-571591/v1), 2021-06-02
Supplement: Supplementary file 2 [file 69149a83765f260f1867d4e7.docx]

**Supplementary file**

**3D QSAR Pharmacophore based virtual screening, ADME analysis and estimation of MM/GBSA binding free energies of azoles as a potential inhibitor of DprE1 for Mycobacterium tuberculosis**

Madhavaram Madhavi1, NampallyVenkatesh1 ,Tigulla Parthasarathy1

MadhavaramMadhavi

[Yasalamanvi06@gmail.com](mailto:Yasalamanvi06@gmail.com)

NampallyVenkatesh

[nampallyabc@gmail.com](mailto:nampallyabc@gmail.com)

✉Tigulla Parthasarathy

[sarathychem@gmail.com](mailto:sarathychem@gmail.com)

1 Department of chemistry,

Osmania University,

Tarnaka,

Hyderabad- 500007,

India.

**Table**

**Table S1**. Compounds used for 3D QSAR model

**Figure**

**Figure S1. Binding mode analysis of molecules from S3 to S7. (a)** Binding mode analysis of molecule S3(ZINC01372996), (b) Binding mode analysis of molecule S4 (ZINC00927639), (c) Binding mode analysis of molecule S5(ZINC00926220), (d) Binding mode analysis of molecule S6(ZINC01372999), (e) Binding mode analysis of molecule S7 (ZINC32536674). The violet color bonds indicates H-bonds, red color bonds indicates that Pi- cation interactions and green color indicates Pi-Pi stacking interactions.

| **Table S1**. Compounds used for 3D QSAR model | | | | | | |
| --- | --- | --- | --- | --- | --- | --- |
| 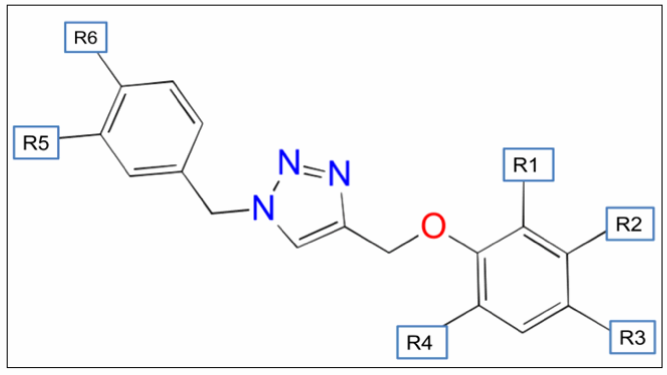 | | | | | | |
| Compound | -R1 | -R2 | -R3 | -R4 | -R5 | -R4 |
| M1 | -H | -H | -H | -H | -H | -NO2 |
| M2 | -H | -H | -H | -H | -NO2 | -H |
| M3 | -H | -H | -H | -H | -H | -C1 |
| M4 | -H | -H | -H | -H | -C1 | -H |
| M5 | -H | -H | -H | -H | -H | -Br |
| M6 | -H | -H | -CH3 | -H | -H | -NO2 |
| M7 | -H | -H | -CH3 | -H | -NO2 | -H |
| M8 | -H | -H | -CH3 | -H | -H | -C1 |
| M9 | -H | -H | -CH3 | -H | -C1 | -H |
| M10 | -H | -H | -CH3 | -H | -H | -Br |
| M11 | -H | -H | -C1 | -H | -H | -NO2 |
| M12 | -H | -H | -C1 | -H | -NO2 | -H |
| M13 | -H | -H | -C1 | -H | -H | -C1 |
| M14 | -H | -H | -C1 | -H | -C1 | -H |
| M15 | -H | -H | -C1 | -H | -H | -Br |
| M16 | -H | -NO2 | -H | -H | -H | -NO2 |
| M17 | -H | -NO2 | -H | -H | -NO2 | -H |
| M18 | -H | -NO2 | -H | -H | -H | -C1 |
| M19 | -H | -NO2 | -H | -H | -C1 | -H |
| M20 | -H | -NO2 | -H | -H | -H | -Br |
| M21 | -H | -CH3 | -C1 | -H | -H | -NO2 |
| M22 | -H | -CH3 | -C1 | -H | -NO2 | -H |
| M23 | -H | -CH3 | -C1 | -H | -H | -C1 |
| M24 | -H | -CH3 | -C1 | -H | -H | -Br |
| M25 | -C1 | -H | -C1 | -C1 | -H | -NO2 |
| M26 | -C1 | -H | -C1 | -C1 | -NO2 | -H |
| M27 | -C1 | -H | -C1 | -C1 | -H | -C1 |
| M28 | -C1 | -H | -C1 | -C1 | -C1 | -H |
| M29 | C1 | -H | -C1 | -C1 | -H | -Br |
| M30 | -I | -H | -NO2 | -I | -H | -NO2 |
| M31 | I | -H | -NO2 | -I | -H | -Br |

| 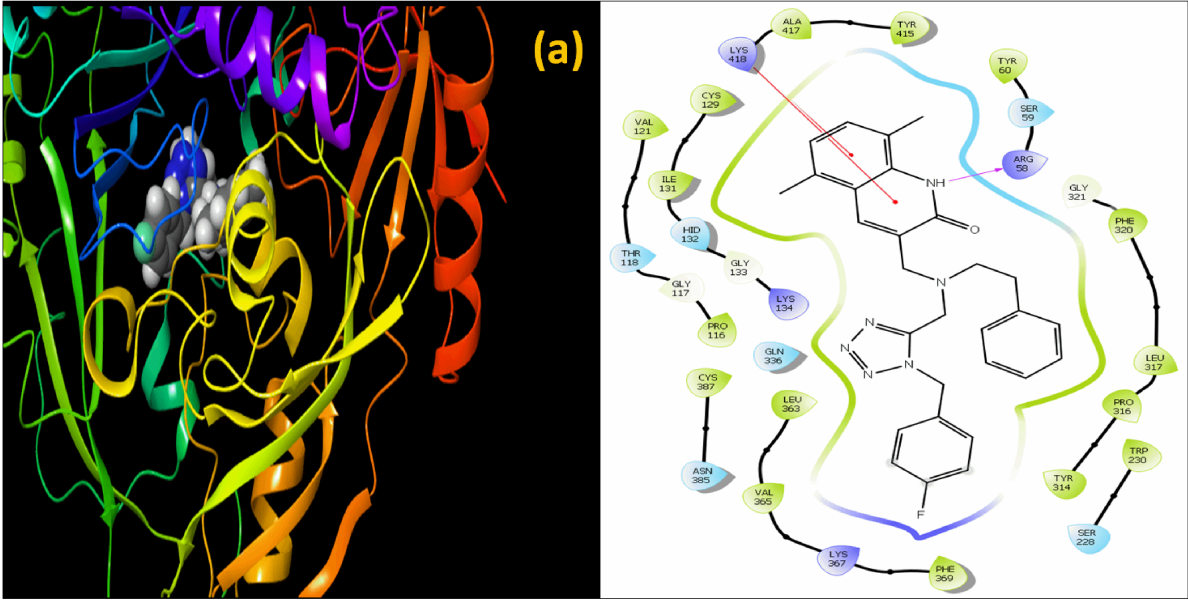 |
| --- |
| 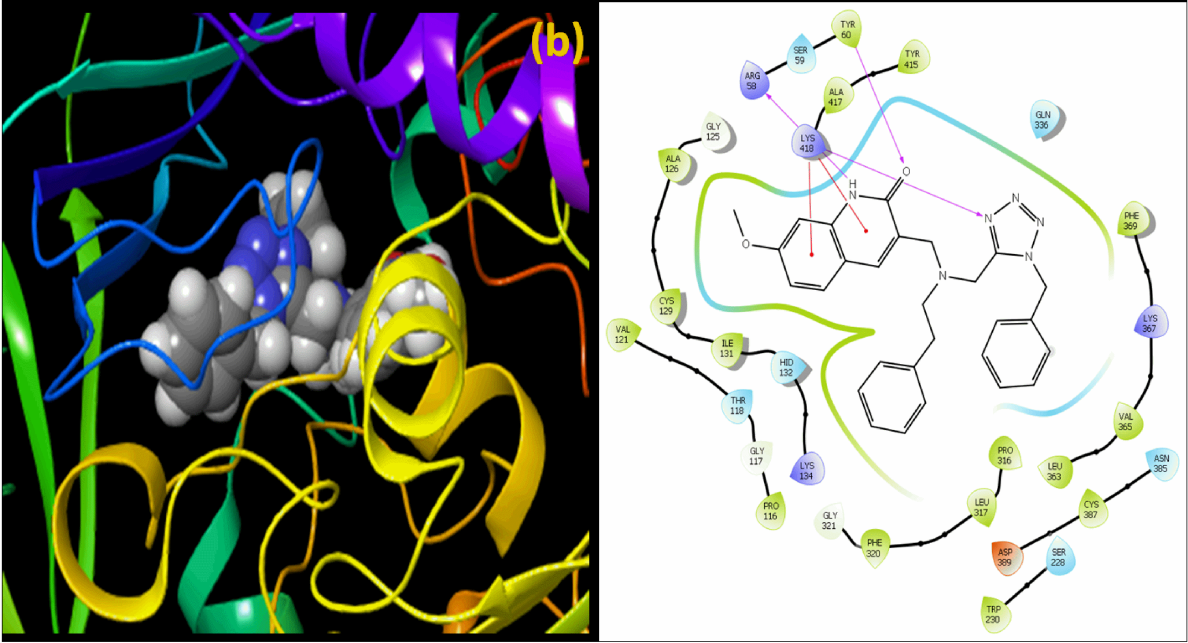 |
| 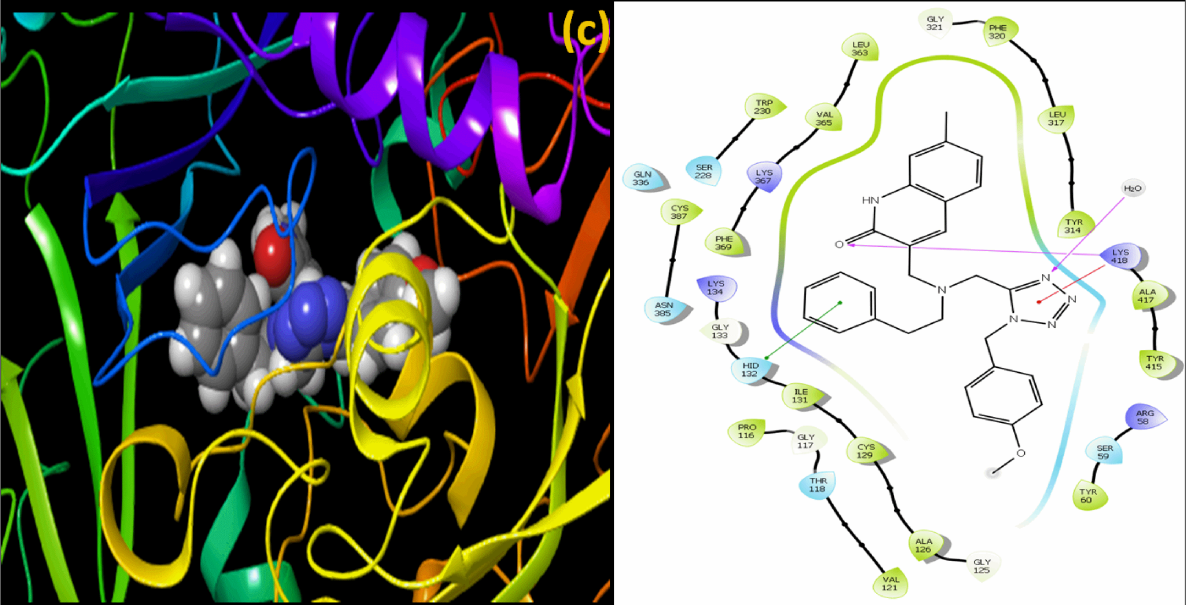 |
| 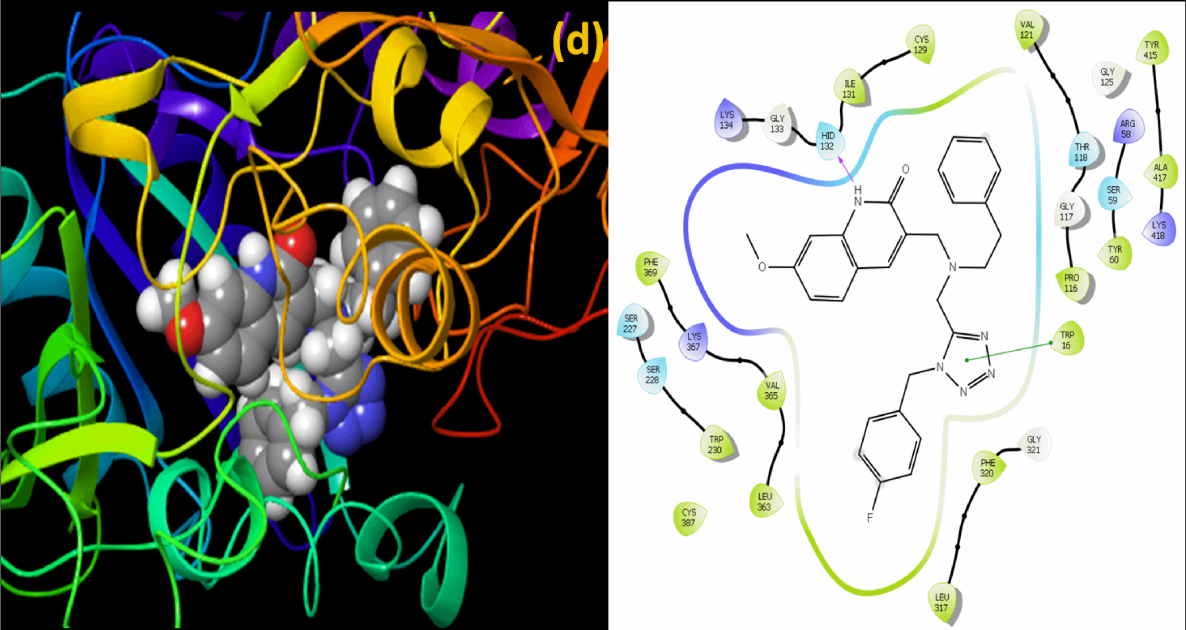 |
| 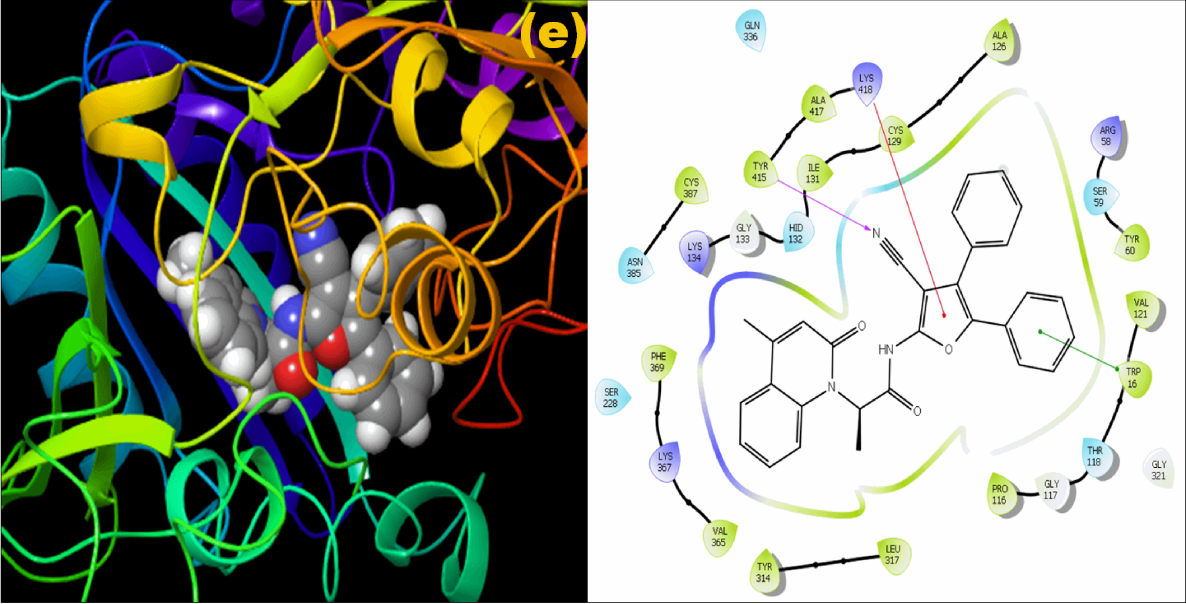 |
|  |
| **Figure S1. Binding mode analysis of molecules from S3 to S7. (a)** Binding mode analysis of molecule S3(ZINC01372996), (b) Binding mode analysis of molecule S4 (ZINC00927639), (c) Binding mode analysis of molecule S5(ZINC00926220), (d) Binding mode analysis of molecule S6(ZINC01372999), (e) Binding mode analysis of molecule S7(ZINC32536674). The violet color bonds indicates H-bonds, red color bonds indicates that Pi- cation interactions and green color indicates Pi-Pi stacking interactions. |
